# Supplementary material for: The transfer and transformation of collective network information in gene-matched networks
Source: PubMed Central journal article supplement (PMC4598864; doi:10.1038/srep14984), 2015-10-09
Supplement: srep14984-s1.pdf [file srep14984-s1.pdf]

- 1 **The transfer and transformation of collective network information in**
- 2 **gene-matched networks**
- 3
- 4 **Authors:** Takashi Kitsukawa and Takeshi Yagi
- 5
- 6 **Supplementary Figures and legends**
- 7 **Supplementary Methods**

8  
9  
10  
11  
12  
13  
14  
15  
16  
17  
18  
19  
20  
21  
22  
23  
24  
25  
26  
27  
28  
29  
30  
31  
32  
33  
34  
35  
36  
37  
38  
39  
40  
41

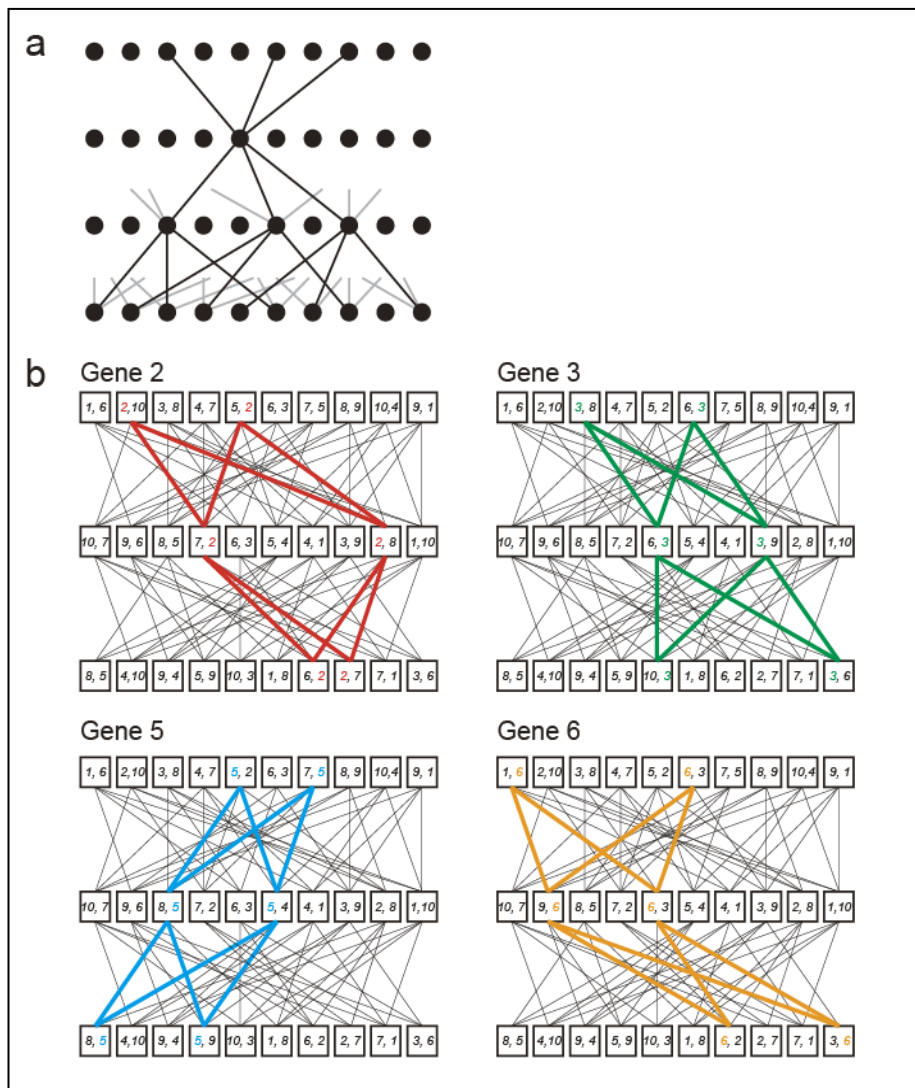

**Supplementary Figure 1 | Controlled divergence of signals by genes expressed in the GMN. a,** Averaging effect of the random network. Black closed circles represent neurons. The random convergence and divergence of signals is equivalent to averaging. **b,** Complete sub-networks in a three-layer GMN in which each neuron expresses two genes selected from a GR of 10 genes. The subnetworks composed of neurons expressing genes 2, 3, 5 and 6 are highlighted in red, green, blue, and yellow, respectively. Each subnetwork is complete, suggesting that the information within a subnetwork will be retained across the layers. Thus, the information content of the entire network may be divided and stored in subnetworks.

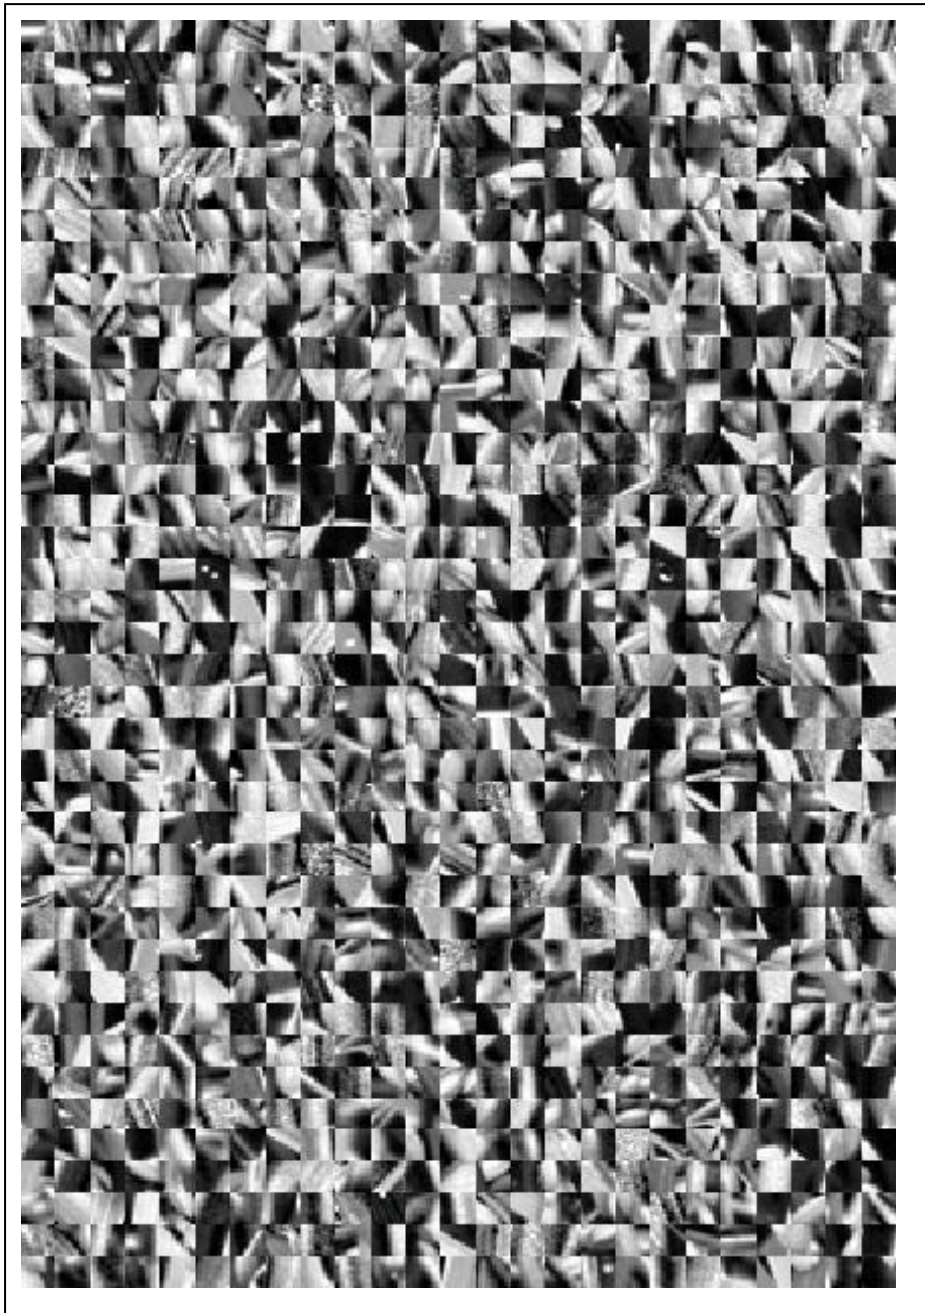

42 **Supplementary Figure 2 | 1000 samples of 12×12 pixel images randomly selected**  
43 **from the original photograph in Fig. 4a.**  
44

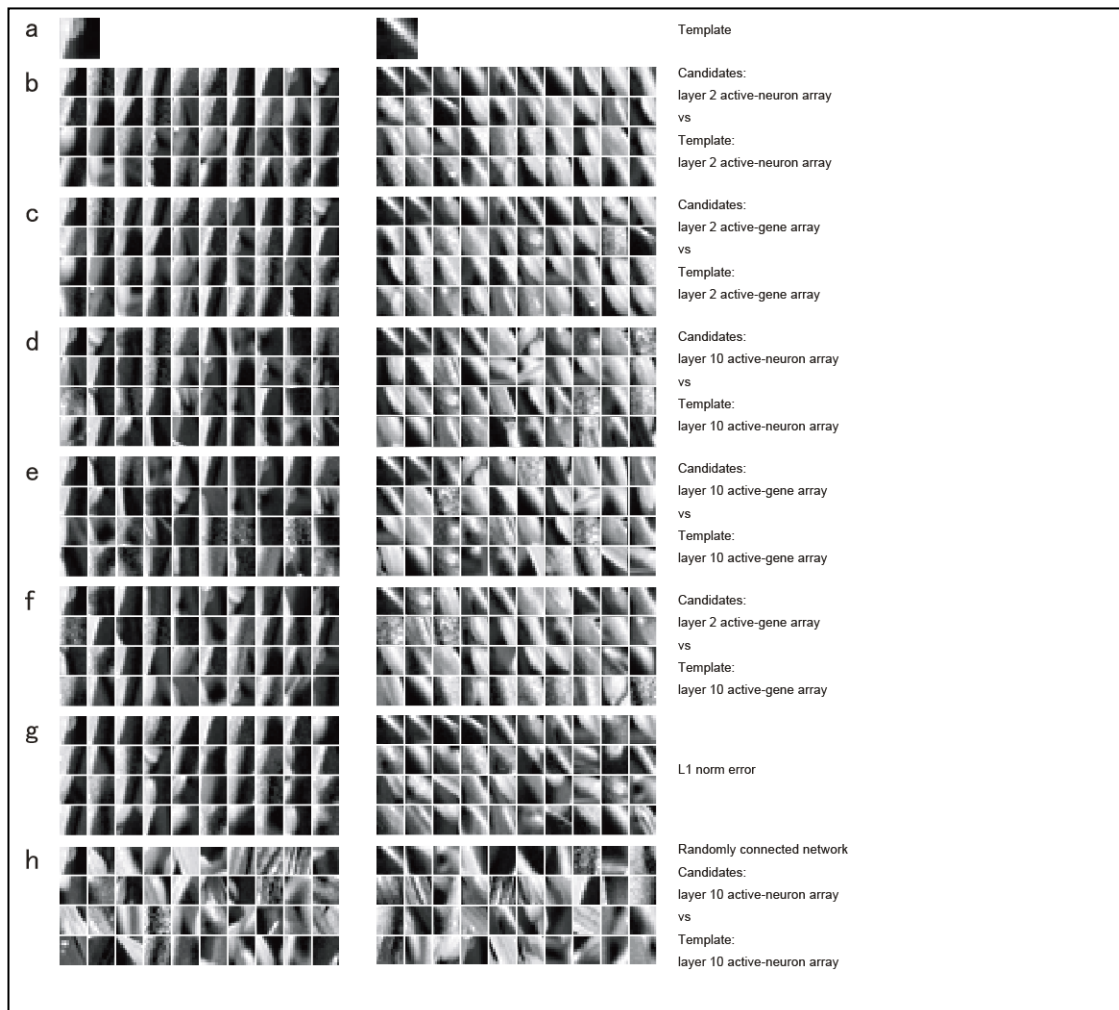

45 **Supplementary Figure3 | Images listed according to their similarity to the**  
 46 **active-neuron or active-gene arrays.** Randomly chosen images (candidates,  
 47 Supplementary Fig. 2) from the photograph in Fig. 4a were used as inputs in a 10-layer  
 48 GMN. The active-neuron arrays or active-gene arrays of these images were compared to  
 49 those of the two template images (a). **b**, Top 40 images showing similarity between the  
 50 active-neuron arrays of layer 2 and both the layer 2 candidate and template images. **c**,  
 51 Top 40 images showing similarity between the active-gene arrays of layer 2 and both  
 52 the layer 2 candidate and template images. **d**, Top 40 images showing similarity  
 53 between the active-neuron arrays of layer 10 and both the layer 10 candidate and  
 54 template images. **e**, Top 40 images showing similarity between the active-gene arrays of  
 55 layer 10 and both the layer 10 candidate and template images. **f**, Top 40 images showing  
 56 similarity between the active-gene arrays of layer 10 and both the layer 2 candidate and  
 57 template images. **g**, Top 40 images listed according to the least square error. **h**, Top 40  
 58 images showing similarity between the active-neuron array of layer 10 and the layer 10  
 59 candidate images in a random network.

60 **Supplementary Figure 4 |**  
61 **Another example of the**  
62 **transformation of the**  
63 **active-gene arrays by**  
64 **various GMNs.** The  
65 GMNs of GR = 50 and GE  
66 =5 were used. The  
67 transmission polarities are  
68 specified with arrows  
69 (positive) and bars  
70 (negative). **a**, template  
71 image and the common  
72 part (layer 1 and 2).  
73 AP(layer2) = 50%. **b**,  
74 AP(layers 3~10) = 50%. **c**,  
75 AP(layer 3) = 50%. **d**, The  
76 GMN designed after the  
77 cerebellar network with  
78 layer 2 to 5 corresponding  
79 to the pontine nuclei,  
80 granule cell layer, Purkinje  
81 cell layer and cerebellar nuclei, respectively. AP(layer 3~5) = 25%. The combination  
82 ratio between main and side branches was 1:2. **e**, The GMN designed after the basal  
83 ganglia with layer 3 to 6 corresponding to the striatum, external globus pallidus,  
84 substantia nigra pars reticulata and thalamic nuclei, respectively. AP(layers 3, 4, 5, 6) =  
85 25, 10, 25, 25%. The combination ratio between main and side branches was 1:2. **f**, the  
86 active-gene array of layer 2 aligned in descending order by the template image in **a**. The  
87 gene order in this re-aligned array is called the input order. **g**, the active-gene array in  
88 layer 2 averaged over 5000 candidate images (sd, gray area). **h, j, l, n**, the active-gene  
89 arrays at the last layer of the GMNs **b, c, d** and **e**, respectively, activated by the template  
90 image **a**. **i, k, m, o**, the active-gene arrays averaged over the 5000 images at the last  
91 layer of the GMNs **b, c, d** and **e**, respectively (average, solid line; sd, gray area). **p, q, r,**  
92 **s**, the example images listed according to the similarity of their active-gene arrays at  
93 layer 2 to the active-gene array of the template image at the last layers of GMNs **b, c, d**  
94 and **e**, respectively. The active-gene arrays shown in **h-s** are realigned in the input order.

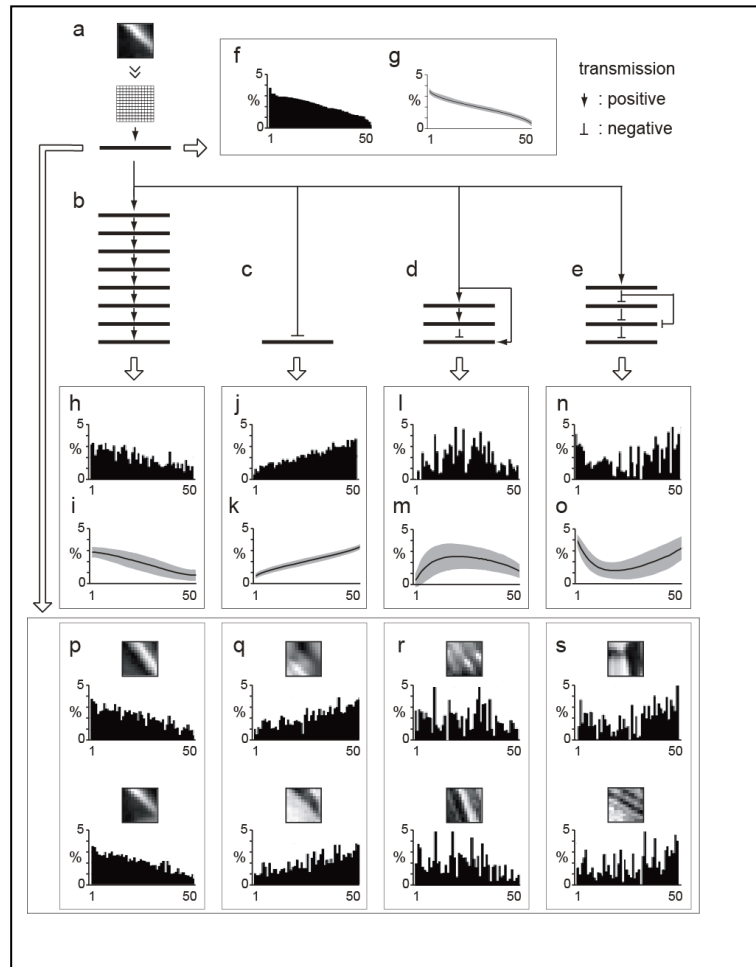

95  
96  
97  
98  
99  
100  
101  
102  
103  
104  
105  
106  
107  
108  
109  
110  
111  
112  
113  
114  
115  
116  
117  
118  
119  
120  
121

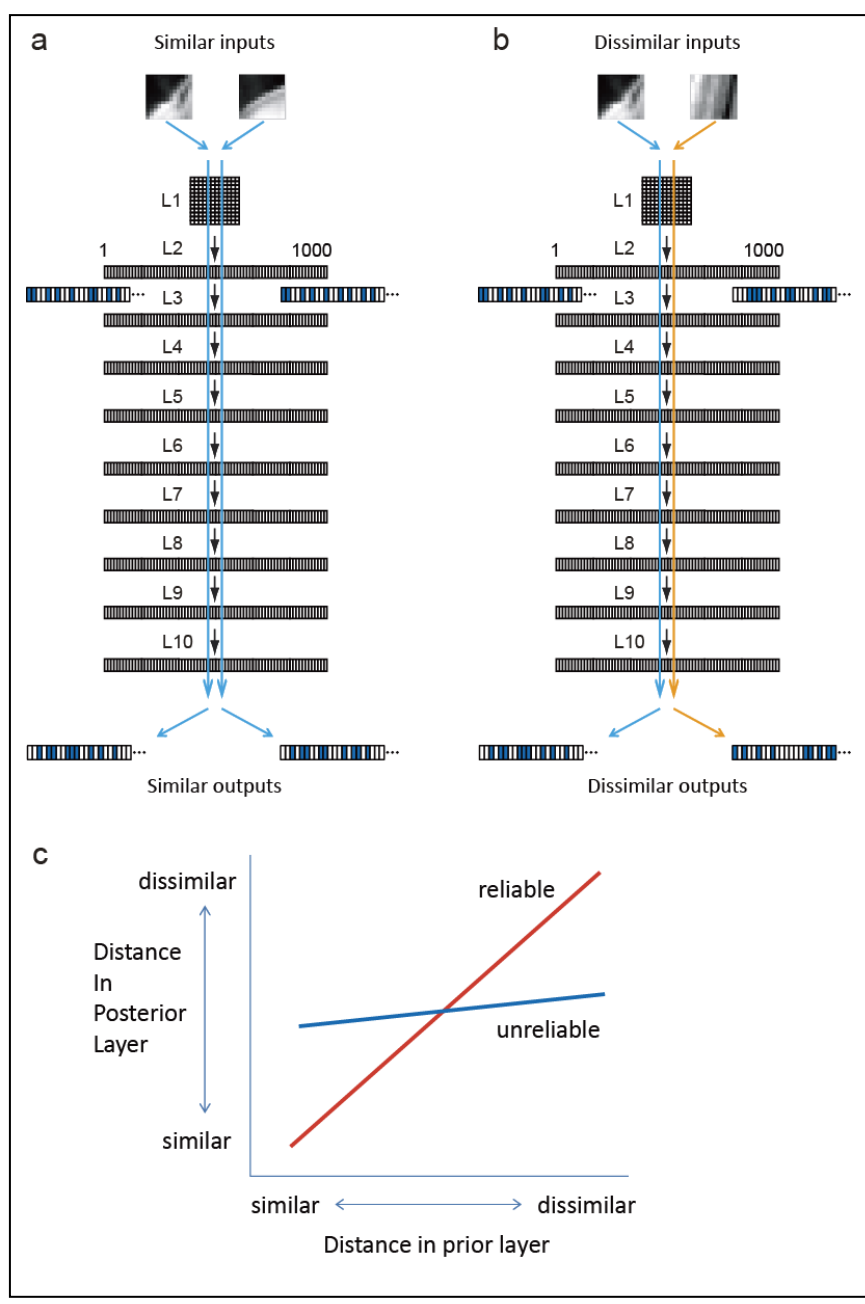

122 **Supplementary Figure 5 | Cross-layer consistency: Analysis of similarity and**  
123 **distance between a pair of inputs and outputs.**  
124 **a, b,** If a network demonstrates reliable information transfer, similar inputs should  
125 return similar outputs (a), and dissimilar inputs should return dissimilar outputs (b),  
126 even after passing through multiple layers. In addition, the distance between a pair of  
127 independent inputs should correlate with the distance of their outputs. **c,** When these  
128 relationships between the input and output pairs are plotted, the slope of the data points  
129 should be close to “1” for a reliable network. In contrast, if a network is not reliable, the  
130 slope will be flat.

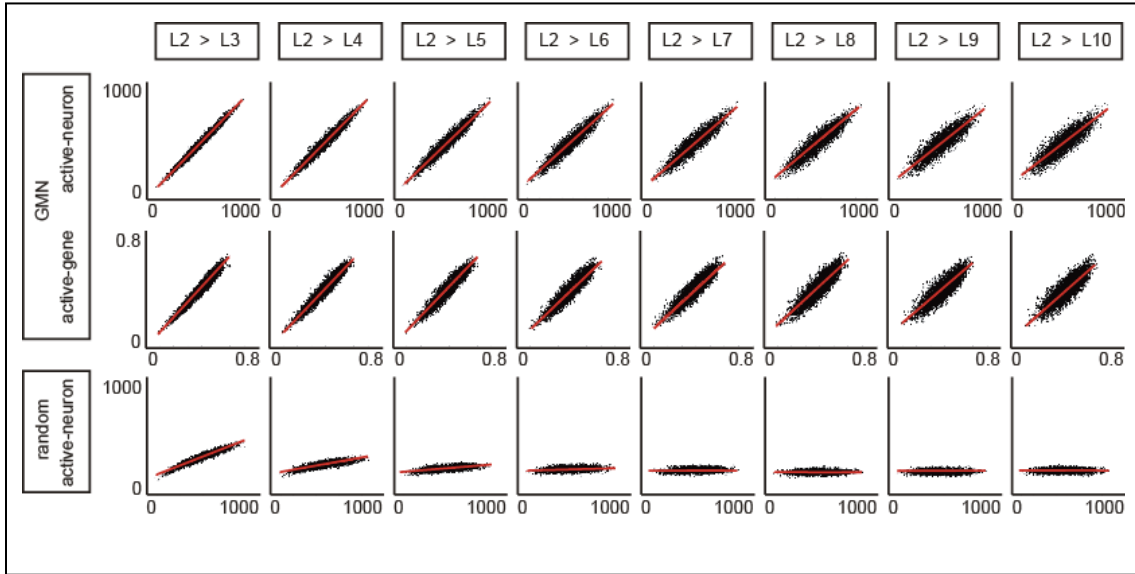

131 **Supplementary Figure 6 | Analysis of cross-layer consistency.** One thousand pairs of  
 132 images were used as inputs in 10-layer networks. The distance between a pair of outputs  
 133 at layers 3 to 10 (from left to right) was plotted against the distance between the  
 134 corresponding pair of outputs at layer 2 (outputs at layer 2 were used as inputs in layer  
 135 3). The distances were calculated using the active-neuron (top) and active-gene arrays  
 136 (middle) of GMNs (GR=50, GE=5), and the active-neuron arrays of random networks  
 137 (bottom). Red lines represent the linear approximation of distance distribution obtained  
 138 by linear regression analysis.

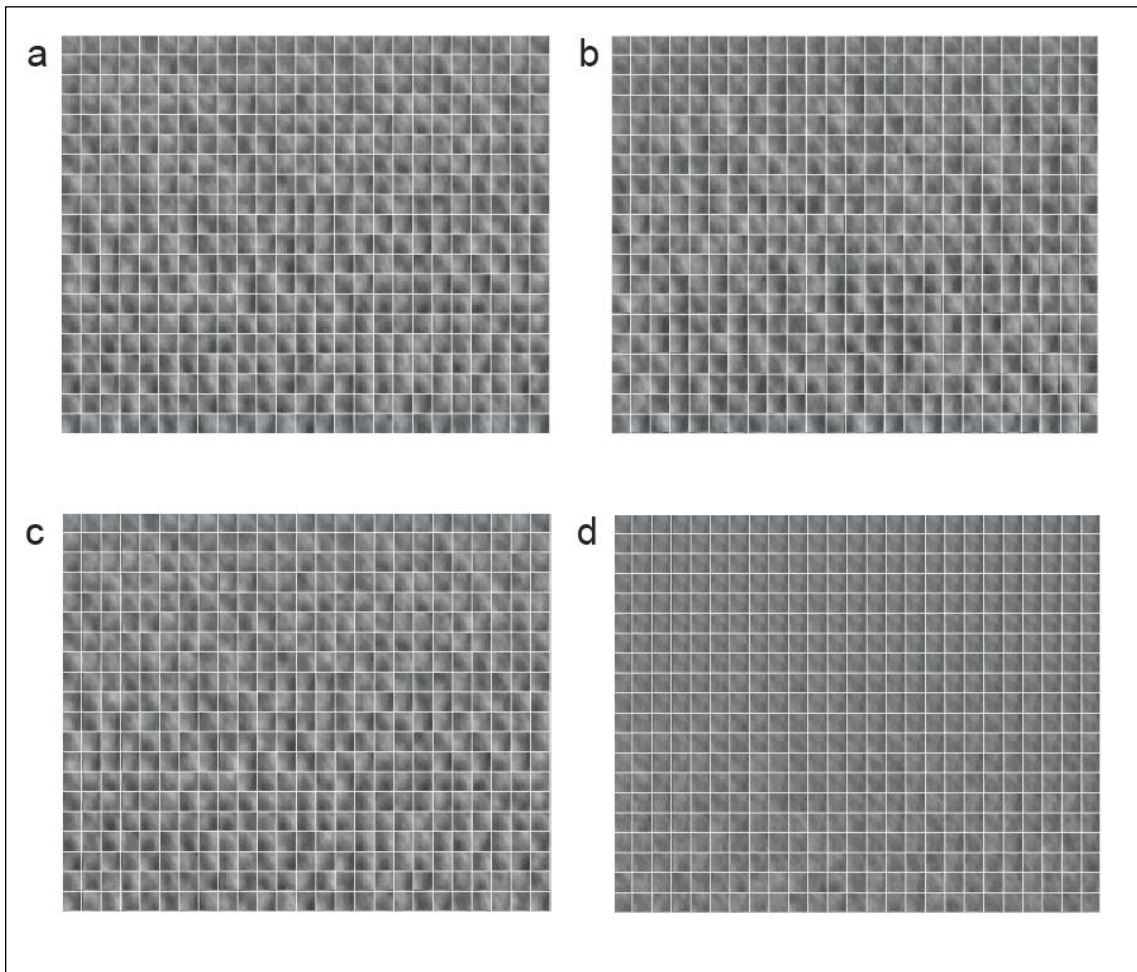

139

140

141 **Supplementary Figure 7 | Averaged input images for individual neurons.** The averaged  
142 images of the top 500 neurons most frequently activated in a layer (1000 neurons) are shown (top  
143 left to right bottom). **a**, The third layer of a GMN of 1000 neurons (GR=50, GE=5, AP=50%). **b**,  
144 The tenth layer of the same GMN. **c**, The second layer of a random network. **d**, The tenth layer of  
145 the same random network.



146  
147  
148  
149  
150  
151  
152  
153  
154  
155  
156  
157  
158  
159  
160  
161

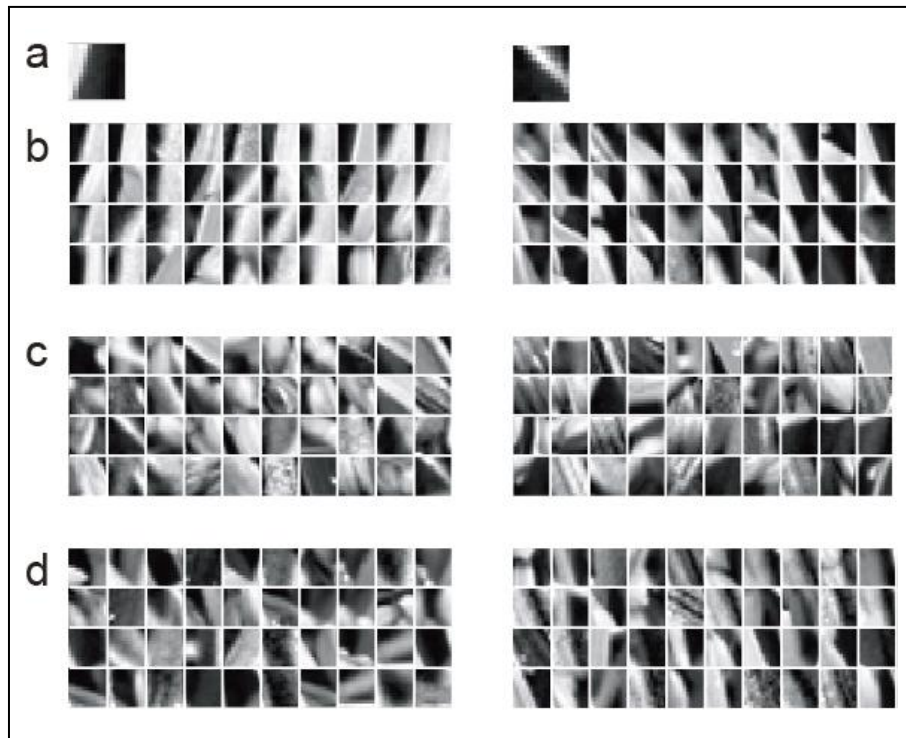

162 **Supplementary Figure 8 | Images corresponding to the active-gene arrays obtained from**  
163 **complex GMNs. a,** Template images. The active-gene arrays of these images, obtained from the last  
164 layers of each complex network, were used as templates. The images, which showed similar  
165 active-gene arrays at layer 2 to the templates, are shown in b–d. **b,** Top 40 images identified when  
166 bottom-ranked neurons were activated by the GMN shown in Fig 5c. **c,** Top 40 images identified  
167 when the complex GMN shown in Fig. 5d was used. **d,** Top 40 images identified when the complex  
168 GMN shown in Fig. 5e was used.

169 **Supplementary methods**

170

171 ***Circular GMNs***

172 Circular GMNs were established using the gene expression matrix,  $\mathbf{E}$  and the  
173 connection matrix,  $\mathbf{C}$ . The gene expression matrix  $\mathbf{E}$ , which is an  $N \times Gr$  matrix,  
174 describes the gene expression, where  $N$  is the number of neurons and  $Gr$  is the GR size.  
175 The component of  $\mathbf{E}$ ,  $e_{ij}$ , describes the number of  $j^{\text{th}}$  genes expressed in the  $i^{\text{th}}$  neuron.

$$e_{ij} = \begin{cases} n, & \text{when neuron } i \text{ expresses } n \text{ molecules of gene } j, \\ 0, & \text{when neuron } i \text{ does not express gene } j. \end{cases}$$

176 The connection among the neurons in the circular GMN is described by an  $N \times N$  matrix  
177  $\mathbf{C}$ ,

$$\mathbf{C} = \mathbf{E}\mathbf{E}^T - \mathbf{D}$$

178 where  $\mathbf{D}$  is an  $N \times N$  diagonal matrix, whose diagonal components are equal to those of  
179  $\mathbf{E}\mathbf{E}^T$ . The matrix  $\mathbf{D}$  was subtracted so that the diagonal components of  $\mathbf{C}$  would be zero,  
180 because the GMN does not possess self-edges. The superscript T denotes the matrix  
181 transpose operation.

182 When the short path length and the clustering coefficient were calculated,  
183 multiple connections between any neuron pairs were considered as a single connection.  
184 The clustering coefficient CC was calculated as

185 
$$CC = \frac{1}{N} \sum_N \frac{\text{number of triangles}}{\text{number of adjacent node pairs}}.$$

186 In the experiments in which the effect of the GR size was examined using  
187 GMNs with various GR sizes, expressed genes were selected randomly from a gene  
188 repertoire and assigned to neurons one by one in a rotational manner until the number of  
189 connections in the network reached 500.

190

191 ***Multi-layer GMN construction***

192 A layer of GMNs was formed with 1,000 neurons unless otherwise mentioned. All  
193 connections were made between neighboring layers. No connection was made within a  
194 layer. Neuron pairs in adjacent layers were connected when both neurons expressed one  
195 or more common genes. The number of connections between a pair of neurons was  
196 equivalent to the number of shared genes. The multi-layer GMNs were directed  
197 networks, and signals were always transmitted from the top to the bottom layer. In all  
198 multi-layer GMNs, unless otherwise mentioned, neurons expressed 5 genes randomly  
199 selected from a repertoire of 50 genes.

200 To generate a connection matrix between two layers in the layered GMN, the

201 gene expression matrix of the  $n^{\text{th}}$  layer,  $\mathbf{E}(n)$ , and  $n+1^{\text{th}}$  layer,  $\mathbf{E}(n+1)$ , were  
 202 concatenated to establish a gene expression matrix for the two layers,  $\mathbf{E}(n,n+1)$ .

$$\mathbf{E}_{(n,n+1)} = [\mathbf{E}(n), \mathbf{E}(n+1)] = \begin{pmatrix} e_{11}^n & \dots & e_{1Gr}^n \\ \dots & \dots & \dots \\ e_{N1}^n & \dots & e_{NGr}^n \\ e_{11}^{n+1} & \dots & e_{1Gr}^{n+1} \\ \dots & \dots & \dots \\ e_{N1}^{n+1} & \dots & e_{NGr}^{n+1} \end{pmatrix}$$

203 Thus,  $\mathbf{E}(n,n+1)$  is a  $2N \times Gr$  matrix where  $N$  is the number of neurons and  $Gr$  is the gene  
 204 repertoire. The multiplication of this matrix yields a  $2N \times 2N$  matrix  $\mathbf{C}$ , which can be  
 205 partitioned into four  $N \times N$  matrices as follows.

$$\mathbf{C} = \mathbf{E}_{(n,n+1)} \mathbf{E}_{(n,n+1)}^T = \begin{bmatrix} \mathbf{C}_{(n,n)} & \mathbf{C}_{(n+1,n)} \\ \mathbf{C}_{(n,n+1)} & \mathbf{C}_{(n+1,n+1)} \end{bmatrix}$$

206  $\mathbf{C}_{(n,n+1)}$  was used for the connection matrix from the  $n^{\text{th}}$  layer to  $n+1^{\text{th}}$  layer.  
 207

### 208 ***Information transfer experiments using multi-layer GMNs***

209 Five thousand images ( $12 \times 12$  pixels) were randomly collected from a  
 210 photograph (Fig. 4a and Supplementary Fig. 2) and used as inputs to the multi-layer  
 211 network. The  $12 \times 12$  images were reshaped into a 144 dimensional vector  $\mathbf{x}$ .  $\mathbf{x}=(x_1, \dots,$   
 212  $x_{144})^T$  captures the pixel intensity in the image (256 gradations of black to white). The  
 213 connection matrix between layers 1 and 2,  $\mathbf{C}_{(1,2)}$ , is a  $1000 \times 144$  matrix. The input to the  
 214 second layer,  $\mathbf{i}_{L2}$  was calculated as

$$\mathbf{i}_{L2} = \mathbf{C}_{(1,2)} \mathbf{x}$$

215 In other words, the sum of inputs for  $i^{\text{th}}$  neuron in the second layer was calculated as

$$\mathbf{i}_{L2}(i) = \sum_{j=1}^{144} \mathbf{x}(j) c_{ij}$$

216 where  $c_{ij}$  is the component in the  $i^{\text{th}}$  row and  $j^{\text{th}}$  column of  $\mathbf{C}_{(1,2)}$ , which represents the  
 217 number of connections between the  $j^{\text{th}}$  neuron in the first layer and the  $i^{\text{th}}$  neuron in the  
 218 second layer ( $c_{ij}$  is '0' where no connection was formed). Thus,  $\mathbf{i}_{L2}$  corresponds to the  
 219 sum of inputs to each neuron in layer 2 (see Fig. 3a). The activated neurons in the  
 220 second layer were determined according to the amount of input. The percentage of  
 221 activated neurons, the activation percentage (AP), was set for each layer. In the  
 222 information transfer experiment, neurons ranking in the upper 50% in the level of input  
 223 received (represented as AP50), were activated in layers 2 to 10. The output array,  
 224 which represents the activity of neurons in a layer, consists of as many components as  
 225 the number of neurons in the layer, in which '1' stands for activated neurons and '0' for  
 226 non-activated neurons. Thus, the output array for layer 2 is

227 
$$\mathbf{o}_{L2}(k) = \begin{cases} 1, & \text{if } \mathbf{i}_{L2}(k) \text{ in AP} \\ 0, & \text{otherwise} \end{cases} .$$

228 Then, the  $\mathbf{o}_{L2}$  is transferred to layer 3 as

$$\mathbf{i}_{L3} = \mathbf{C}_{(2,3)} \mathbf{o}_{L2}$$

229 and then  $\mathbf{o}_{L3}$  is determined according to the AP for layer 3. In this manner, signals were  
 230 transferred to subsequent layers. The output array  $\mathbf{o}$  is also called the active-neuron  
 231 array.

232 In the GMN, output was also analyzed using the active-gene array. The  
 233 active-gene array represents the profile of genes expressed in activated neurons in a  
 234 particular layer. The active-gene array  $\mathbf{g}$  is thus comprised of as many components as  
 235 the GR size,  $\mathbf{g} = (g_1, \dots, g_{Gr})^T$ , where  $Gr$  is the GR size.  $g_n$  captures the number of the  $n^{\text{th}}$   
 236 gene expressed in activated neurons. The active-gene array  $\mathbf{g}$  was calculated with the  
 237 gene expression matrix and the output array  $\mathbf{o}$  (the active-neuron array). For example,  
 238 the active-gene array for the output in layer 3,  $\mathbf{g}_{L3}$ , was calculated as

239 
$$\mathbf{g}_{L3} = \mathbf{E}_{L3}^T \mathbf{o}_{L3}$$

240

241 ***Estimation of reliability in information transfer***

242 The faithfulness of information transfer was estimated by the cross-layer consistency of  
 243 distances between a pair of information inputs. The cross-layer consistency was  
 244 assessed using 1) the active-neuron array  $\mathbf{o}$  and 2) the active-gene array  $\mathbf{g}$ . When the  
 245 information is transferred faithfully across layers, similar outputs from a preceding layer  
 246 should result in similar outputs of the following layer (Supplementary Fig. 5). More  
 247 specifically, the distance between outputs in a preceding layer should positively  
 248 correlate with the distance between resulting outputs in the following layer.

249 1) Estimation of faithfulness in information transfer using the active-neuron array

250 The estimation of faithfulness with the active-neuron array was carried out using the  
 251 distance between two different outputs. The distance between two active-neuron array  
 252 pairs ( $D_{neuron}$ ),  $\mathbf{o}^1$  and  $\mathbf{o}^2$ , was calculated as

$$D_{neuron} = \sum_{n=1}^N |\mathbf{o}^1(n) - \mathbf{o}^2(n)|$$

253 where  $N$  is the number of neurons in the layer. One thousand pairs of outputs were used  
 254 for each network. The correlation between the distances of the same output pairs  
 255 obtained from a preceding layer and the following layer is plotted in Supplementary Fig.  
 256 6, in which the horizontal axis indicates the distance in the preceding layer and the  
 257 vertical axis indicates the distance in the following layer. The slope obtained by linear

258 regression analysis of the distances was used as the score of reliability of a network. The  
259 slopes obtained from GMNs and degree-matched random networks were compared.

260 2) Estimation of information transfer using expressed genes

261 The estimation of faithfulness using genes expressed in active neurons was carried out  
262 using the distances ( $D_{gene}$ ) between a pair of active-gene arrays,  $\mathbf{g}^1$  and  $\mathbf{g}^2$ .

$$D_{gene} = \sum_{n=1}^{Gr} |\mathbf{g}^1(n) - \mathbf{g}^2(n)|$$

263 where  $Gr$  is the GR size. The slope obtained by linear regression analysis of the  
264 distances was used for the score of network reliability as in (1).

265

### 266 ***Image search***

267 Five thousand images (12×12 pixels) randomly chosen from a photograph (Fig. 4a)  
268 were used as candidate images. The information of the template images (Fig. 5a and  
269 Supplementary Fig. 4a) was transferred and transformed through the multi-layer  
270 networks shown in Fig. 5b-e. The active-gene arrays of the template images obtained in  
271 the last layer of each GMN were compared to the active-gene arrays of the candidate  
272 images obtained in layer 2. The difference between the active-gene arrays of template  
273 and candidate images was calculated in the same manner as the calculation of  $D_{gene}$ .
